# Supplementary material
Source: publisher figshare collection journal article supplement (https://gsapubs.figshare.com/ndownloader/files/34804831)
Supplement: Supplementary file 1 [file 34804831]

## Sheet: Table S1
Table S1: EMPA analyses of fenestral and laminar oxides within Hartbeesfontein stromatolites
Point#	Date	Comment	Mg (wt%)	Si (wt%)	Al (wt%)	Ca (wt%)	Fe (wt%)	Mn (wt%)	O (wt%)	Total (wt%)	Position X (mm)	Position Y (mm)	Position Z (mm)
1	2021-03-05 13:32:03	laminar oxide 1	0.0193	0.8472	0.0806	0.0552	64.1562	0.0279	28.6506	93.8369	-22794	-1047	459
2	2021-03-05 13:36:45	laminar oxide 2	0.251	1.0373	0.3225	0.0772	56.9959	0.023	26.1651	84.872	-23646	-790	459
3	2021-03-05 13:40:56	laminar oxide 3	0.2718	1.0163	0.4662	0.1581	56.3256	0.0347	26.0304	84.3031	-24385	-800	459
4	2021-03-05 13:45:10	laminar oxide 4	0.0679	0.7488	0.3582	0.2212	57.9995	0.0195	26.2354	85.6505	-24827	-108	459
5	2021-03-05 13:49:42	laminar oxide 5	0.0429	0.8857	0.6246	0.2719	60.4933	0.0263	27.7058	90.0504	-24910	-139	455
6	2021-03-05 13:57:01	laminar oxide 6	0.0486	0.6509	0.2338	0.0749	64.3662	0.0747	28.6942	94.1433	-18609	6875	444
7	2021-03-05 14:00:05	laminar oxide 6-2	0.0096	0.4294	0.1814	0.0738	61.2088	0.0464	27.004	88.9533	-18610	6905	444
8	2021-03-05 14:03:12	laminar oxide 7	0.0152	1.9123	0.0354	0	64.158	0.0213	29.798	95.9402	-18613	7149	444
9	2021-03-05 14:07:10	laminar oxide 7-2	0.0662	0.2679	0.0281	0.0352	64.7318	0.0017	28.2065	93.3375	-18628	7132	444
10	2021-03-05 14:14:20	laminar oxide 8	0.0271	0.533	0.1216	0.0284	62.8985	0.0102	27.7778	91.3966	-15143	12565	459
11	2021-03-05 14:17:36	laminar oxide 8-2	0.0047	0.9724	0.2891	0.1085	61.8463	0.0417	28.0017	91.2645	-15145	12558	459
12	2021-03-05 14:26:01	fenestral oxide 9 bubble	2.2888	0.831	1.3596	1.5883	12.4089	36.0632	20.1326	74.6724	-1593	15731	461
13	2021-03-05 14:36:52	fenestral oxide 9 adjacent qtz	0.006	47.4134	0.032	0.0074	0	0.0233	54.0638	101.546	-1606	15747	461
14	2021-03-05 14:44:25	laminar oxide 10	0.0552	0.5234	0.0505	0.0226	0.084	0	0.7227	1.4583	-1008	13040	466
15	2021-03-05 15:15:13	fenestral oxide 11	0.1082	2.8529	0.035	0.1828	38.7346	0.1624	20.119	62.1948	-997	12466	466
16	2021-03-05 15:21:47	fenestral oxide 12	0.1055	11.4174	0.4009	0.1936	47.4453	0.0408	33.9132	93.5167	-859	12454	466
17	2021-03-05 15:27:21	laminar oxide 13	0	0.4322	0.0952	0.0397	65.4303	0.0502	28.7258	94.7734	57	12034	466
18	2021-03-05 15:31:06	laminar oxide 14	0.0152	0.3636	0.0685	0.0213	65.1149	0.0699	28.4968	94.1501	-156	11877	466
19	2021-03-05 15:33:47	laminar oxide 15	0.0247	0.1043	1.3796	0.011	54.4295	0.0448	24.7705	80.7645	-185	11863	466
20	2021-03-05 15:37:36	laminar oxide 15-2	0.0006	0.1241	1.4867	0.0838	50.7331	0.0153	23.3043	75.7478	-192	11878	466
21	2021-03-05 15:45:10	fenestral oxide 16	0.5058	12.9674	0.6111	20.2753	13.7386	0.0135	29.6532	77.7648	-1785	11547	466
22	2021-03-05 15:48:23	fenestral oxide 16-2	0.0799	15.9601	1.6136	24.4957	12.1837	0.0087	34.6895	89.0312	-1785	11548	466
23	2021-03-05 15:50:31	fenestral oxide16 adjacent qtz	0	46.4268	0.0163	0.0008	0.0129	0	52.916	99.3728	-1771	11549	466
24	2021-03-05 16:02:12	fenestral oxide17	0.0163	6.7724	0.0482	0.0399	0.0423	0.012	7.8015	14.7326	-1512	10965	466
25	2021-03-05 16:05:26	fenestral oxide17-2	0.0182	1.3387	0.0581	0.0178	0.1004	0.015	1.6292	3.1774	-1512	10963	466
26	2021-03-05 16:10:11	fenestral oxide 18	0.1379	2.2567	0.0602	0.3673	63.0167	0.2865	20.9995	87.1247	-1931	10471	470
27	2021-03-05 16:19:50	fenestral oxide19	0.0013	25.3133	0.0345	0.0025	0.0037	0	28.875	54.2303	-1395	13251	472
28	2021-03-05 16:30:28	laminar oxide 20	3.3413	0.2155	87.5177	0.0144	0.8858	0.3107	80.6416	172.927	3610	15214	457
29	2021-03-05 16:48:15	laminar oxide 21	0	0.7714	0.0906	0.0266	64.3079	0.0124	19.3977	84.6066	6415	8134	464
30	2021-03-05 17:00:57	laminar oxide 22-1	0.039	1.3002	0.1152	0.0658	64.6361	0	20.1538	86.3102	4104	9194	477
31	2021-03-05 17:08:46	laminar oxide 22-2	0.0317	0.4638	0.0316	0.0318	65.503	0	19.3564	85.4182	4103	9173	477

## Sheet: Table S2
Table S2: LA-ICP-MS analyses of Hartbeesfontein stromatolites
All concentrations are in µg/g
Calibrations were treated with Fe as an internal standard using the Matlab package SILLS (73)
File	Label	Location	Li7	Be9	B11	Mg25	Al27	Ca43	Ti49	Cr53	Mn55	Fe57	Co59	Ni60	Rb85	Sr88	Y89	Zr91	Nb93	Cs133	Ba138	La139	Ce140	Pr141	Nd146	Sm147	Eu151	Tb159	Gd160	Dy161	Ho165	Er167	Yb173	Lu175	Hf178	Ta181	Pb208	Th232	U238
PT2.FIN2	N1SC1-1e 2	Fenestal oxide	56.4365	17.8384	246.314	19426.5	234289	18381.5	2366.19	2210.22	12652.9	699400	214.204	11279.1	338.551	180.61	115.856	730.922	6.12375	13.6199	3522.53	24.0835	97.2976	10.0718	48.4247	17.2067	4.05823	2.92548	17.1934	20.7232	4.20197	14.7185	14.0689	2.25247	13.9921	<1.7423	424.266	14.8972	13.7006
PT6.FIN2	N1SC1-1e 6	Fenestal oxide	<56.8549	<26.1544	<40.8642	11635.1	72270.3	<21601.8906	755.418	3578.53	15650.6	699400	<252.3806	809.856	174.443	163.647	131.875	<172.286	<4.6601	4.25752	1977.23	25.3404	63.3579	10.3962	51.2475	16.638	3.81614	3.71063	17.4949	21.5433	3.94086	11.5197	9.50958	<1.828	4.845	<3.8118	228.808	6.70824	18.4132
PT9.FIN2	N1SC1-1e 9	Fenestal oxide	<211.1891	<85.9077	<149.749	12636.4	143955	<82633.8165	2524.08	6570.03	1284.93	699400	<1000.2611	18555.7	186.588	287.934	68.3107	858.72	<15.5493	<10.5158	4112.68	26.3919	89.1933	11.6926	47.011	<45.7332	<11.983	<7.9239	<28.9007	<22.5121	<4.6396	<14.6758	<31.1351	<4.7612	11.8957	<16.8142	463.202	18.2905	11.3232
PT10.FIN2	N1SC1-1e 10	Fenestal oxide	<411.1174	<171.3984	<310.8836	12744.1	211058	<168305.8611	<2751.9535	4054.77	1793.42	699400	<2034.8423	21433.5	222.231	365.316	46.7379	<1443.3477	<26.0205	<20.3267	5349.33	34.8128	135.065	13.1516	69.3653	<74.6336	<19.9549	<19.6832	<60.4893	<61.0007	<7.0358	<40.7046	<36.6581	<19.1286	<8.6573	<35.2581	481.986	7.48884	11.0909
PT13.FIN2	N1SC1-1e 13	Fenestal oxide	<80.6152	<49.7928	<59.6172	12759	131976	42432.2	1991.2	2240.17	10224.1	699400	<381.8526	11955.3	160.409	140.922	62.3137	<263.2045	<6.6305	8.79115	2149.94	18.8217	78.4817	8.13916	34.1546	<17.8266	3.90827	<3.9143	<16.0188	21.3118	4.52634	11.4874	<23.243	<3.91	<6.8465	<8.7935	1455.52	5.61471	12.6733
PT14.FIN2	N1SC1-1e 14	Fenestal oxide	72.8801	22.6894	116.991	26274.3	363401	<17786.995	3192	2553.83	12434.2	699400	<214.3753	11700.7	583.284	205.092	81.4689	283.506	7.71832	20.5518	5116.36	26.8064	100.012	9.24732	44.3708	11.1553	<2.641	2.4034	17.3108	19.1795	3.34454	9.56775	9.67526	1.71695	7.17263	<3.4274	393.801	9.81533	9.50763
PT19.FIN2	N1SC1-1e 19	Fenestal oxide	221.117	79.8473	439.155	79530.6	995329	<35725.6631	17389.7	8361.55	1436.81	699400	<450.6693	3233.58	2249.9	289.315	178.657	1981.24	44.4337	81.9121	14257.7	17.3717	100.716	10.3246	53.9763	19.1871	4.97849	3.41695	17.3775	32.9942	3.72009	23.4704	<22.0008	3.7637	30.5472	<8.8024	687.287	30.1961	35.4986
PT20.FIN2	N1SC1-1e 20	Fenestal oxide	60.9139	<34.8297	153.01	27684.8	299852	<22016.9013	5171.83	1274.7	366.132	699400	<280.7513	1514	871.961	55.5107	109.465	1303.38	19.877	39.1541	5333.81	6.16033	27.3004	6.0304	26.0296	12.1096	4.29777	<2.6328	15.7139	18.7166	3.37622	8.90448	13.2259	3.42023	26.369	<3.4712	1029.97	18.9961	26.7918
3PT1.FIN2	N1SC1-1e 31	Laminar oxide	<18.8043	<8.5703	<13.729	<398.505	18912.3	<8556.2315	209.785	542.453	113.726	699400	<134.5596	506.267	10.4872	3063.38	168.065	139.793	2.08681	0.920877	5856.5	6672.74	2193.11	1293.6	3800.34	444.009	54.0494	16.9459	149.109	65.182	10.7265	20.9729	8.93438	1.32998	3.26791	<1.2095	1481.79	3.3374	5.42861
3PT2.FIN2	N1SC1-1e 32	Laminar oxide	60.9015	26.2013	106.143	13892.9	182430	<26730.7578	9426.1	1709.28	405.831	699400	<421.6506	1099.63	507.575	503.145	202.732	2481.27	44.8191	226.723	2815.59	349.942	188.248	62.6086	197.406	29.3742	<4.9656	4.07227	31.1098	30.32	6.81376	22.5362	19.0805	3.50845	35.709	<4.0499	2002.58	37.0467	42.4936
3PT3.FIN2	N1SC1-1e 33	Laminar oxide	<5.5582	2.48671	8.2097	299.431	1788.28	<2556.5779	<40.887	184.011	221.366	699400	<39.1727	584.254	4.38514	2.40515	10.3377	37.244	<0.40168	<0.23275	24.6884	0.776327	1.69349	0.690802	3.7403	1.61283	0.49344	0.319525	1.57863	2.20854	0.458928	1.06679	1.23002	0.169089	<0.51958	<0.41992	182.807	0.286515	0.770709
3PT4.FIN2	N1SC1-1e 34	Laminar oxide	<2.6287	1.25364	3.86982	477.77	1741.55	<1218.3233	65.4004	430.372	93.3859	699400	300.961	1076.13	2.49443	46.9874	7.17218	23.289	<0.22068	0.205898	125.735	82.1174	9.0334	2.55377	8.99123	2.37629	0.459758	0.298787	2.16996	1.04124	0.292666	0.951078	0.678435	<0.11269	0.24941	<0.19219	391.748	0.202782	0.928323
3PT5.FIN2	N1SC1-1e 35	Laminar oxide	<110.6725	<26.3604	<89.3902	<2357.2298	30320.4	<51017.5047	280730	1042.45	225.033	699400	<780.8423	431.606	47.1305	1400.19	217.954	2396.27	855.432	14.8279	2365.35	5524.34	1229.98	851.184	2185.3	192.625	30.0492	9.71468	81.8283	53.2598	8.81373	25.8927	28.159	<4.2162	34.9016	54.7749	4642.69	35.8409	27.1764
3PT8.FIN2	N1SC1-1e 38	Laminar oxide	<13.882	<7.0511	<11.6541	919.544	3113.34	<6565.3613	<93.8359	865.88	1069.09	699400	<92.7455	1313.37	4.54338	22.1757	22.915	<45.726	<1.1642	<0.64748	25.7894	2.69235	4.88614	1.87388	12.3693	5.79053	0.989106	0.835315	4.01275	6.08587	0.941283	3.41094	3.02351	0.523087	<1.3962	<1.1334	151.662	<0.13731	5.82513
PT1.FIN2	N1SC1-1f 1	Weathering rind	<34.1275	<16.1394	49.4771	10271.3	294698	<16726.6546	17229.1	850.554	8079.4	699400	<191.1309	794.867	344.885	651.934	117.909	836.784	47.5692	19.6394	1413.05	343.643	429.701	74.6277	285.576	52.0099	9.94082	4.73008	34.7758	29.9937	4.37671	15.0344	10.7304	1.40841	18.8649	3.8076	564.248	65.6541	10.1107
PT2.FIN2	N1SC1-1f 2	Weathering rind	57.2007	23.2688	64.5157	16043.6	491433	15495.3	29520.1	1412.45	9301.08	699400	<28.8338	696.117	603.384	908.077	214.373	1567.95	76.9606	39.3903	2430.38	517.549	583.411	105.03	417.983	78.0581	14.003	8.42025	62.2126	47.757	8.61752	23.2996	21.9792	3.34282	41.3882	6.53972	657.021	115.268	17.4193
PT3.FIN2	N1SC1-1f 3	Weathering rind	66.9516	20.6574	72.2573	19388.2	534358	15780.1	24890.8	1083.8	8197.74	699400	<95.7211	887.647	680.107	529.389	144.065	1542.63	64.6878	43.9688	2063.21	337.407	440.773	67.5381	270.547	45.7506	7.84786	4.75328	31.5714	30.3722	5.52359	13.2686	14.2171	2.06526	27.8414	5.63057	357.278	63.6879	16.1752
PT4.FIN2	N1SC1-1f 4	Laminar oxide	238.085	63.5052	498.039	91465.9	1143940	<41078.0539	40282.1	3284.51	439.078	699400	<470.1272	593.835	2270.84	117.821	213.949	826.826	122.414	138.514	15949.4	34.8091	40.206	11.1615	<42.4243	<31.6031	6.65954	<7.2856	22.9044	33.6645	7.41528	24.6553	25.0716	4.19455	37.5761	9.66255	134.588	35.85	23.5061
PT6.FIN2	N1SC1-1f 6	Weathering rind	117.367	28.557	90.794	18452	584139	11621.3	29690.2	1453.84	5856.34	699400	<43.2214	763.829	689.926	636.789	202.067	1454.58	89.5654	41.5724	2846	360.099	461.542	77.1145	297.568	62.6086	12.4927	6.81528	49.2555	42.772	7.77182	20.7693	20.0162	3.03067	34.1337	6.70642	486.467	87.3519	21.6805
PT7.FIN2	N1SC1-1f 7	Laminar oxide	<170.6633	<98.5817	358.36	16408.7	783699	<84398.4199	19842.7	3042.7	822.235	699400	<968.761	3942.96	1744.79	167.301	117.784	812.846	46.794	117.856	10324.1	71.0902	108.23	13.1163	46.6824	<32.3825	<12.2938	<6.9377	<19.9881	<26.1502	4.83479	<31.8829	<35.1381	<6.6912	<25.9865	<14.7639	532.782	25.1364	23.03
PT9.FIN2	N1SC1-1f 9	Laminar oxide	<4.3336	4.56232	4.70367	342.094	3822.24	<2207.4986	2231.19	128.172	47.136	699400	<23.7076	307.124	7.0197	8.13981	9.41356	29.4579	6.8672	0.733172	49.9117	2.36838	3.3514	1.09876	4.91339	1.40066	<0.32862	0.280358	1.68742	1.63152	0.369559	0.782272	1.19351	<0.18288	0.659817	0.459508	180.896	0.846701	0.840983
PT10.FIN2	N1SC1-1f 10	Laminar oxide	210.174	<64.1508	4353.67	84795.1	947767	<59026.3083	13820.9	4420.09	345.636	699400	<710.8821	580.153	2100.69	328.076	168.66	2014.54	39.8433	100.534	12511.6	22.9894	73.8035	9.0199	47.0884	<28.0174	<8.9735	<5.9701	22.8326	<24.3108	5.32668	18.3791	<24.1198	<3.8147	26.5964	<9.4029	574.311	29.6271	29.3122
PT11.FIN2	N1SC1-1f 11	Laminar oxide	<2.6717	3.67973	2.44001	234.619	1345.75	<1259.8491	53.6349	14.0497	168.158	699400	73.2832	430.168	2.32782	4.08669	9.05168	<11.1079	<0.22922	<0.1511	15.2436	2.60816	1.19424	1.15206	6.48743	1.82248	0.437684	0.326729	2.18386	1.73956	0.316361	0.887152	0.84526	<0.12685	0.14182	<0.23007	127.221	<0.080223	0.551668

## Sheet: G49894
Wilmeth, D.T., et al., 2022, Evidence for benthic oxygen production in Neoarchean lacustrine stromatolites: Geology, v. 50, https://doi.org/10.1130/G49894.1
